# Supplementary material
Source: Springer Nature journal article supplement (https://www.springermedizin.de/resource/supplementary/12947_2009_281_MOESM1_ESM.pdf/9556606)

A

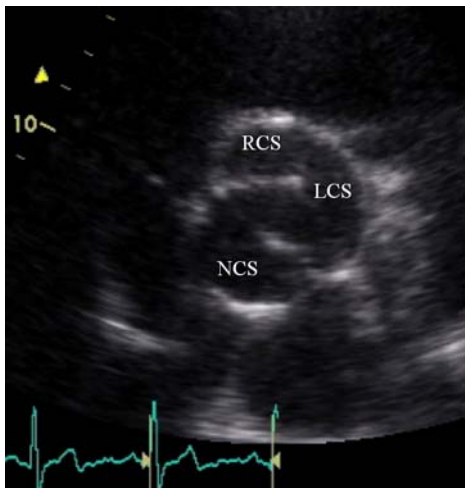

B

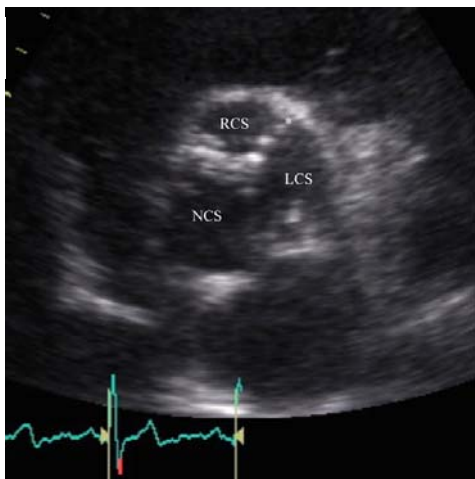

Supplement: MOESM1 [file 9556606]
